# Supplementary material
Source: PubMed Central journal article supplement (PMC2544568)
Supplement: 0805843105_0805843105SI.pdf [file 0805843105_0805843105SI.pdf]

# Supporting Information

Gao *et al.* 10.1073/pnas.0805843105

## SI Text

### SI Results

**P Transposase-Induced Target Reduction.** We attempted to improve reduction frequency without having to implement an extra step of FLP recombination. Preston *et al.* (1) showed that DSBs generated during P element transposition effectively induced recombination between two direct repeats. Both the 3' and 5' ends of a P element were present in our integration lines, although in an “inside-out” configuration different from the normal one (Fig. 1B). For M3 reduction, induction of P transposase in the soma did lead to higher degrees of eye mosaicism. We also recovered white-eyed progeny more frequently. However, subsequent molecular analyses indicated that most of the white-eyed events (16/23) still retained both *nbs* copies, and therefore did not represent recombinational events between the *nbs* copies (data not shown).

**A Two-Step Recombineering Scheme for Landing Site Placement in Plasmids.** The relatively large *att* sites ( $\approx 250$  bp) that we and others used have to be strategically placed, such as in introns or intergenic regions, without interfering with target gene expression. This creates a challenge for traditional bacterial cloning using restriction enzymes and DNA ligase. We devised a two-step scheme using the “recombineering” method in bacteria (2) to efficiently modify various *nbs* fragments cloned into pTV2 (Fig. S1). We used long primer pairs to generate PCR products of a chloramphenicol-resistant gene (Cm), flanked by 50-bp *nbs* homologous arms. PCR products were transformed into recombineering competent cells that had been previously transformed with the *nbs* constructs. Recombination products between the linear PCR products and the circular vector, which carries an ampicillin resistant gene (Ap), were selected as Ap and Cm double resistant colonies. Using the condition outlined in *Materials and Methods*, we routinely recovered up to 50 colonies per transformation. We analyzed multiple colonies (usually 10) for every transformation. All checked colonies were the result of precise homologous recombination in bacteria. The Cm gene was excised by an 8-bp restriction enzyme, which cut site was embedded in the long PCR primers. The linearized plasmid was used either for ligation using the overhangs created by the eight cutter, or in a second round of recombineering with PCR-amplified *att* sequences flanked by the same *nbs* homology arms. Gap repair by recombination circularized the plasmid DNA, allowing efficient bacterial transformation.

### SI Materials and Methods

**Recombineering for *att* Placement.** Recombineering was performed according to online protocols published at <http://recombineering.ncifcrf.gov/>. The bacterial strain SW102, kindly provided by Dr. Don Court (National Cancer Institute), was used for the entire study. A position between *nbs* and *CG14174* was

selected for *att* placement. A Cm marker was first inserted at this position by recombineering. The Cm marker was amplified using primers CmFsenbs2998 and CmAscbs2898 from a template in the plasmid pACYC184 (kindly provided by D. Chattoraj, National Cancer Institute). CmFsenbs2998 consists of a 50-bp *nbs*-homologous sequence to one side of the desired *att* insertion site, followed by the cut site for the 8-bp cutter FseI, then followed by 20 bp of sequence homologous to Cm. CmAscbs2898 consists of a 50-bp *nbs* sequence homologous to the other side of the *att* insertion site followed by a cut site for the 8-bp cutter AscI, then followed by Cm homologous sequence. To eliminate the possibility of the Cm-resistant clones from the small amount of pACYC184 DNA as PCR templates, we diluted the PCR products at least 1,000-fold and used them for a second round of PCR amplification. Close to 1  $\mu$ g of this second round of PCR products was cotransformed into SW102 cells with a few hundred nanograms of plasmid DNA from various *nbs* constructs in pTV2. We have also carried out recombineering by transforming smaller amounts of PCR products into SW102 cells that already had the *nbs* constructs. Cm and Ap double resistant clones were selected, plasmid DNA isolated, and retransformed into regular cloning strains to eliminate hitchhiking clones that were Cm sensitive. Once single correct clones were identified, plasmid DNA was cut with the 8-bp cutters and ligated with similarly digested PCR products of *attP* and *attB*. The primers attPend-AscI and attPhead-FseI were used to amplify *attP* from the plasmid pBCPB+ (kindly provided by Dr. Calos, Stanford University, Stanford, CA). The primers attBend2-AscI and attBhead-FseI were used for *attB* amplification from the same plasmid. These four primers were also used to verify the presence of *attR* and *attL* sites on integrants from microinjection experiments. A 40bp *attB* site was placed similarly in M40 using the annealed product of oligos FseattB40Ascplus and FseattB40Ascminus. An *attB* site was similarly placed into M7 using the primers nbs5499AscCm and nbs5600FseCm.

**Additional Reagents for SIRT.** Because the pTV2 vector was used for both the initial *attP* targeting step and all of the subsequent SIRT manipulations, we converted it into a Gateway vector using the conversion kit from Invitrogen to facilitate the cloning of large genomic fragments. The Gateway cassette was cloned into a blunted Acc65I in pTV2, creating vectors pTV2gw#4 and pTV2gw#10, in which the cassettes are in different orientations. The genomic clones can be PCR amplified and cloned by using the pCR8/GW/TOPO TA cloning kit from Invitrogen, and subsequently subcloned into pTV2gw vectors. We also created cassettes: FseI-Cm-FseI-attP and FseI-Cm-FseI-attB. In these cassettes, the Cm marker is flanked by two FseI sites, and at one side of Cm we placed either an *attP* or an *attB* site. These cassettes allow researchers to PCR amplify both Cm and *att* sites for recombineering. Once the correct clones are identified, the Cm marker can be excised by an FseI digestion followed by plasmid self-ligation.

1. Preston CR, Engels W, Flores C (2002) Efficient repair of DNA breaks in *Drosophila*: Evidence for single-strand annealing and competition with other repair pathways. *Genetics* 161:711–20.
2. Sawitzke JA, *et al.* (2007). Recombineering: in vivo genetic engineering in *E. coli*, *S. enterica*, and beyond. *Methods Enzymol* 421:171–199.

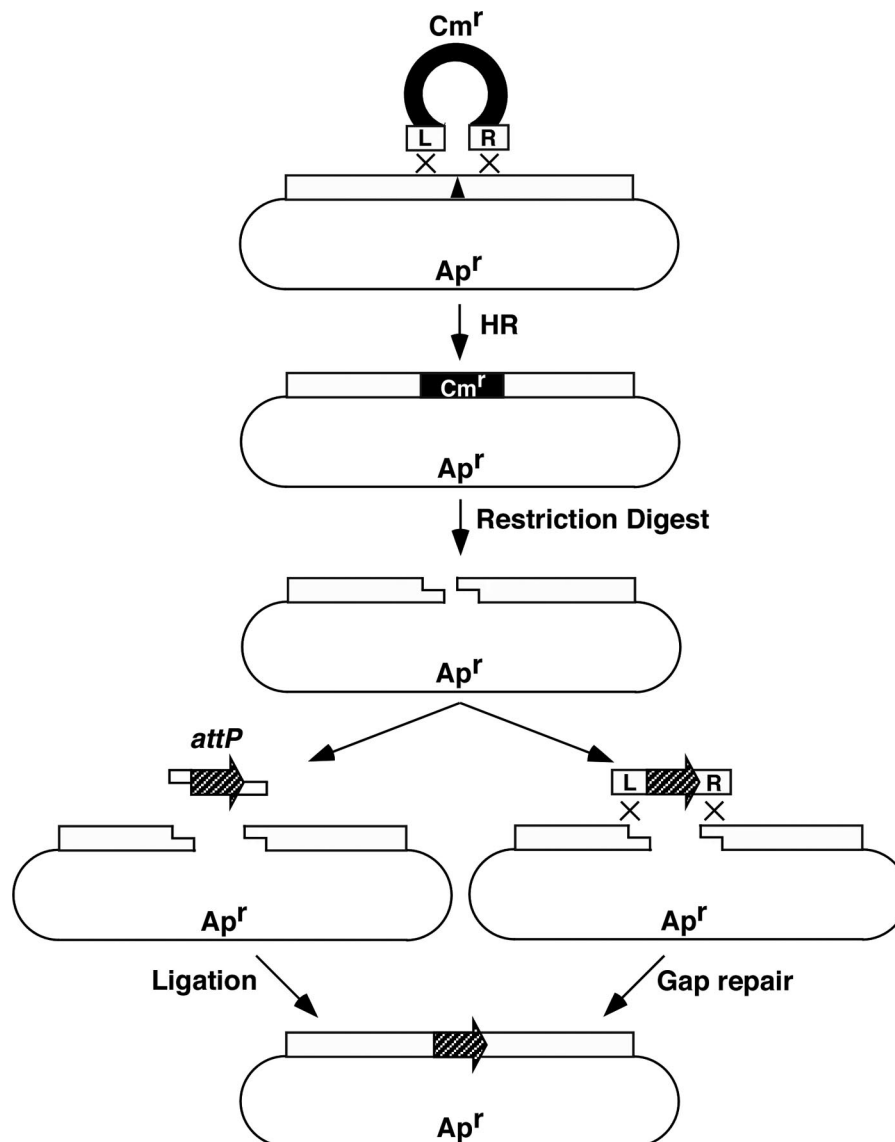

**Fig. S1.** A two-step recombineering scheme. (Top) The  $Cm^r$  gene is PCR amplified with primers carrying left and right arms of homology (L and R) to the insertion position (arrow head) on the plasmid vector, which carries  $Ap^r$ . Recombineering produces a plasmid carrying both  $Cm^r$  and  $Ap^r$ . The plasmid is digested with a rare-cutting enzyme, which recognition site was included in the PCR primers for  $Cm^r$  amplification. This cut plasmid can be either ligated to  $attP$  fragments carrying similar overhangs (left), or used in a second round of recombineering with  $att$  fragments carrying the initial homology arms (right). The desired plasmid carries only  $Ap^r$ .

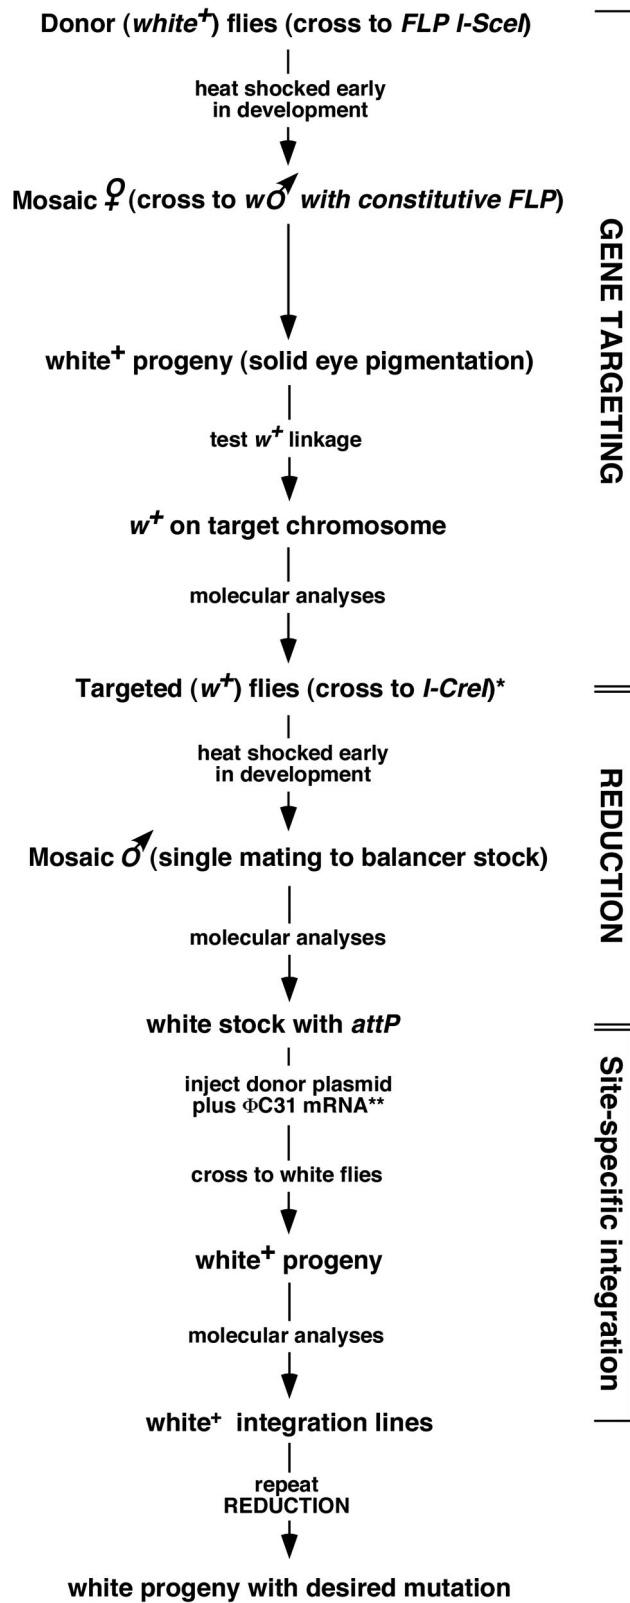

**Fig. S2.** A flow chart for carrying out SIRT experiments. (\*) An optional step can be added to excise the vector backbone by FLP recombination for reduction after  $\phi$ C31-mediated plasmid integration. (\*\*) Instead of using mRNA, one can construct a line with the targeted *attP* and a transgene expressing  $\phi$ C31 endogenously.
